# Supplementary material
Source: publisher figshare collection journal article supplement (https://asha.figshare.com/articles/dataset/_/14963676)
Supplement: Supplementary file 1 [file 1]

**Supplemental Appendix C.** Elicitation task sentences for nonfinite clauses with different subjects.

| Scenario   | Verbs   | Sentence                                  |
|------------|---------|-------------------------------------------|
| Breakfast  | Want    | Giraffe wanted pig to cook pancakes.      |
|            | See     | Pig saw cat drink his milk.               |
|            | Tell    | Cat told giraffe to open the door.        |
|            | Make    | Giraffe made pig find the kettle.         |
| Housework  | Promise | Pig promised cat to play hide and seek.   |
|            | Need    | Cat needed giraffe to get the cushion.    |
|            | Watch   | Giraffe watched pig push the table.       |
| Playground | Promise | Pig promised cat to push the swing.       |
|            | Help    | Cat helped giraffe to climb the ladder.   |
|            | Want    | Giraffe wanted pig to hold his hand.      |
|            | See     | Pig saw cat find the ball.                |
| Bath time  | Tell    | Cat told giraffe to fix the tap.          |
|            | Make    | Giraffe made pig hold the curtain.        |
|            | Promise | Pig promised cat to get the towel.        |
| Bed time   | Need    | Cat needed giraffe to hold the pram.      |
|            | Watch   | Giraffe watched pig find his pillow.      |
|            | Promise | Pig promised cat to fix the dolls' house. |
|            | Help    | Cat helped giraffe to climb the ladder.   |
