# Supplementary material
Source: publisher figshare collection journal article supplement (https://asha.figshare.com/articles/dataset/_/14963676)
Supplement: Supplementary file 2 [file 1]

**Supplemental Appendix F.** Examples of lexical substitutions by children with language impairment.

| Type of substitution | Target sentence                              | Child's utterance                                                                            |
|----------------------|----------------------------------------------|----------------------------------------------------------------------------------------------|
| Noun                 | Cat promised pig to get his towel.           | Cat promised pig to get his curtain towel.                                                   |
|                      | Cat needed the giraffe to hold the pram.     | Cat needed the giraffe to hold the "put-in."                                                 |
|                      | Monkey wished dog would cook sausages.       | Monkey wish dog make a good breakfast.                                                       |
|                      | Horse forgot that monkey pushed the swing.   | Horse forgot that monkey pushed the slide.                                                   |
|                      | Pig saw cat drinking his milk                | Pig saw cat drink pig's cup.                                                                 |
| Verb                 | Dog told horse he fixed the toilet.          | Dog told horse he fixed the bath.                                                            |
|                      | Cat needed the giraffe to hold the pram.     | Cat needed giraffe push the pram.                                                            |
|                      | Cat helped giraffe climb the ladder.         | Cat helped giraffe help him                                                                  |
|                      | Dog wished that horse would hold the ladder. | Dog wished horse will climb the ladder so dog can climb up.<br>Dog wish that horse climb up. |
|                      | Horse forgot that monkey found the ladder.   | Horse forgot that monkey saw the ladder.                                                     |
|                      | Giraffe made pig find the kettle.            | Giraffe made pig sleep.                                                                      |
|                      | Horse hoped monkey fixed the TV.             | Horse hoped monkey broke the TV.                                                             |
|                      | Giraffe watched pig push the table.          | Giraffe watch pig pick the telly up.                                                         |
|                      | Giraffe made pig hold the curtain.           | Giraffe made pig hop in the bath.<br>Giraffe made pig miss the shower.                       |
|                      |                                              |                                                                                              |
