# Supplementary material
Source: publisher figshare collection journal article supplement (https://asha.figshare.com/articles/dataset/_/14963676)
Supplement: Supplementary file 3 [file 1]

## **Supplemental Appendix E.** Cuing hierarchy and examples of training items.

### Hierarchy of cues:

1. Repeat lead question
2. Repeat scenario
3. Provide direction about what information is missing
4. Provide model and request repetition

### Training items: Nonfinite clauses with different subjects

1. The friends are outside by the wall.  
Cat is having fun on the wall.  
He is jumping.  
There he goes, all along the wall.  
  
Cat jumped .....  
You tell turtle what happened.  
Cat .....  
Cat jumped on the wall.
2. Pig is walking on the wall but he's a bit scared.  
He needs a hand.  
Who will hold pig's hand?  
Pig asks giraffe, "Giraffe, will you hold my hand?"  
  
Pig asked .....  
You tell turtle what happened.  
Pig .....  
Pig asked giraffe to hold his hand.

### Training items: Sentential complements

1. Horse is jumping.  
What can he jump over?  
Oh look, there he goes.  
Over the wall.  
  
Horse jumped .....  
You tell owl what happened.  
Horse .....  
Horse jumped over the wall.
2. Horse looks at the wall. It is broken.  
Who broke the wall?  
Horse guesses. He guesses monkey.  
"Monkey broke the wall."

Horse guessed .....  
You tell owl what happened.  
Horse.....  
Horse guessed that monkey broke the wall.
