# Supplementary material
Source: publisher figshare collection journal article supplement (https://asha.figshare.com/articles/dataset/_/14963676)
Supplement: Supplementary file 4 [file 1]

**Supplemental Appendix D.** Elicitation task sentences for sentential complements.

| Scenario   | Verbs   | Sentences                                    |
|------------|---------|----------------------------------------------|
| Breakfast  | Wish    | Monkey wished that dog would cook sausages.  |
|            | Tell    | Dog told horse that he found the cup.        |
|            | Think   | Horse thought that monkey fixed the door.    |
|            | Pretend | Monkey pretended that dog drank coffee.      |
| Housework  | Tell    | Dog told horse that he pushed the chair.     |
|            | Hope    | Horse hoped that monkey fixed the TV.        |
|            | Say     | Monkey said that dog took the mat.           |
| Playground | Know    | Dog knew that horse took the skateboard.     |
|            | Forget  | Horse forgot that monkey pushed the swing.   |
|            | Tell    | Monkey told dog that he found the ball.      |
|            | Wish    | Dog wished that horse would hold the ladder. |
| Bath time  | Think   | Horse thought that monkey took the towels.   |
|            | Pretend | Monkey pretended that dog ate the soap.      |
|            | Tell    | Dog told horse that he fixed the toilet.     |
| Bed time   | Hope    | Horse hoped that monkey found the doll.      |
|            | Say     | Monkey said that dog pushed the pram.        |
|            | Know    | Dog knew that horse took the doona.          |
|            | Forget  | Horse forgot that monkey found the ladder.   |
