# Supplementary material
Source: publisher figshare collection journal article supplement (https://asha.figshare.com/articles/dataset/_/14963676)
Supplement: Supplementary file 5 [file 1]

**Supplemental Appendix A.** Examples of stories and elicitation tasks for nonfinite clauses with different subjects.

**Macrostructure**

This is a house where some friends live. In the house today are giraffe, pig, and cat. They do lots of things like we do at home, like getting breakfast, having a bath, and going to bed. They play together and even do the housework sometimes. Sometimes they get in muddle and do the wrong thing and sometimes they do some strange things. But although they sometimes annoy each other, they get on pretty well. We're going to play a game with them today and see how they go doing all the things they have to do inside the house and outside.

*In a confidential whisper:*

In this game, we also have a special visitor each time we play. A different visitor comes each time. Today's visitor is here. I don't know him very well because he's just arrived. It's a turtle. He's come from the zoo and he wants to know about these friends here and what people do in houses. He only knows what happens in the zoo. But when I tried to talk to him, he got a bit shy and went into his shell. I think he'll be happier with a kid like you. I'll get you to tell him what the friends did in the house and in the playground. He'll listen to you.

I'm going to tell you some short stories about the friends here and you can tell turtle what happened.

1. Pig turns around.  
He sees cat.  
Cat is drinking pig's milk.  
Oh dear!

Pig saw .....  
You tell turtle what happened.  
Pig .....  
Target: Pig saw cat drinking his milk.  
Child: \_\_\_\_\_

2. Cat can't open the door.  
He's holding the casserole.  
He tells giraffe "Open the door."

Cat told .....  
You tell turtle what happened.  
Cat .....  
Target: Cat told giraffe to open the door.  
Child: \_\_\_\_\_

3. Giraffe can't find the kettle.  
But he's a bit lazy.

He calls pig.  
"You find the kettle."

Giraffe made .....

You tell the turtle what happened.

Giraffe .....

Target: Giraffe made pig find the kettle.

Child: \_\_\_\_\_
