# Supplementary material
Source: publisher figshare collection journal article supplement (https://asha.figshare.com/articles/dataset/_/14963676)
Supplement: Supplementary file 6 [file 1]

## **Supplemental Appendix B.** Examples of stories and elicitation tasks for sentential complements.

### **Macrostructure**

Remember the house where the friends live? Today there is monkey, dog, and horse. Last time, there were some other friends. They did lots of things last time, didn't they, like getting breakfast, having a bath, and going to bed. They played together and even did the housework. I think they went outside for a bit on the playground. They got into a bit of a muddle last time. They have to help each other out a bit because they are not very good at doing some things. Sometimes they got a bit upset or a little bit cross, but mostly they seemed pretty happy. We're going to play the game again today and see how they go this time.

### *In a confidential whisper:*

In this game, we also have a special visitor each time we play. A different visitor comes each time. Today's visitor is here. It's wise old owl. He's normally asleep during the day. But he's heard about the toys here and he's been having a bit of a look. He doesn't know much about what goes on in houses because he's normally asleep when we are awake. He's very sleepy because he's normally asleep in the day. I think he might miss what's happening because he's so tired. I'll get you to tell him what the friends did in the house and in the playground today. You might have to give him a nudge to wake him up. We'll sit him next to you. You can tell him what the toys did.

I'm going to tell you some short stories about the friends here and you can tell owl what happened because he's so sleepy he might not see it all happen.

1. Horse looks at the chair. It's in the wrong place.

"Who pushed the chair?"

Dog tells horse. "I pushed the chair."

Dog told .....

You tell owl what happened.

Dog .....

Target: Dog told horse that he pushed the chair.

Child: \_\_\_\_\_

2. Horse is going to watch TV.

He thinks, "Monkey was going to fix the TV. Has he fixed it?"

Horse hopes so.

Horse hoped .....

You tell owl what happened.

Horse .....

Target: Horse hoped that monkey fixed the TV.

Child: \_\_\_\_\_

3. Monkey can't find the mat.  
He says, "Dog has the mat. He took it."

Monkey said .....

You tell owl what happened.

Monkey .....

Target: Monkey said that dog took the mat.

Child: \_\_\_\_\_
