# Supplementary material
Source: publisher figshare collection journal article supplement (https://asha.figshare.com/articles/dataset/_/14963676)
Supplement: Supplementary file 7 [file 1]

**Supplemental Appendix G.** Examples of incorrect syntactic production by children with language impairment.

| <b>Target sentence</b>                      | <b>Child's utterance</b>                                                                        |
|---------------------------------------------|-------------------------------------------------------------------------------------------------|
| Monkey said that dog pushed the pram.       | Monkey said the pram push over.                                                                 |
| Monkey wished that dog would cook sausages. | Monkey wished that he wants sausages for breakfast.                                             |
| Horse hopes that monkey finds the doll.     | Horse hope monkey can't find it.<br>Horse hoped so monkey find the doll.                        |
| Horse thought monkey fixed the door.        | Horse thought he fixed the oven but monkey fixed it.                                            |
| Cat helped giraffe climb the ladder.        | Cat helps giraffe hold his hand in the ladder.<br>Cat helped giraffe push himself up the slide. |
| Monkey pretended that dog drank coffee.     | Monkey pretend dog eat cup of tea he's drinking.                                                |
| Giraffe wanted pig to hold his hand.        | Giraffe wanted pig to help to hold his hand.                                                    |
| Dog wished horse would hold the ladder.     | Dog wished horse wasn't holding the play.                                                       |
| Horse forgot monkey pushed the swing.       | Horse forgot monkey pushed him again.                                                           |
